# Supplementary material for: Cardiovascular Risk Factors Track From Mother to Child
Source: PubMed Central journal article supplement — J Am Heart Assoc. 2018 Sep 26;7(19):e009536. doi: 10.1161/JAHA.118.009536 (PMC6404879; doi:10.1161/jaha.118.009536), 2018-09-26
Supplement: JAH3-7-e009536-s001.pdf [file JAH3-7-e009536-s001.pdf]

# **SUPPLEMENTAL MATERIAL**

**Table S1. Baseline characteristics of women included and excluded in this study (n = 8107).**

|                                                                              | <b>Included</b>   | <b>Excluded</b>   | <b>P-value</b> |
|------------------------------------------------------------------------------|-------------------|-------------------|----------------|
|                                                                              | n = 5743          | n = 2364          |                |
| <b>Pregnancy</b>                                                             |                   |                   |                |
| Age at enrollment (years), mean (SD)                                         | 30.1 (5.1)        | 27.9 (5.5)        | <0.001         |
| Non-European ethnicity (%)                                                   | 42.1              | 60.6              | <0.001         |
| No education/primary school (%)                                              | 11.7              | 21.2              | <0.001         |
| Pre-pregnancy weight, median (5 <sup>th</sup> , 95 <sup>th</sup> percentile) | 64.0 (50.0, 90.0) | 63.0 (49.0, 92.0) | 0.06           |
| SBP at enrollment (mmHg), mean (SD)                                          | 115.6 (12.1)      | 114.8 (12.6)      | 0.01           |
| DBP at enrollment (mmHg), mean (SD)                                          | 68.1 (9.5)        | 67.6 (9.9)        | 0.02           |
| Smoking (%)                                                                  | 27.1              | 35.7              | <0.001         |
| Nulliparous (%)                                                              | 60.1              | 54.9              | <0.001         |
| No folic acid intake, (%)                                                    | 28.3              | 45.3              | <0.001         |
| <b>Pregnancy outcomes</b>                                                    |                   |                   |                |
| Spontaneous preterm birth, (%)                                               | 3.6               | 4.3               | 0.12           |
| Small for gestational age (< p10), (%)                                       | 9.9               | 11.6              | 0.03           |
| Pre-eclampsia (%)                                                            | 2.1               | 2.6               | 0.24           |
| Gestational hypertension (%)                                                 | 4.2               | 3.3               | 0.06           |
| Boys (%)                                                                     | 49.6              | 52.6              | 0.01           |
| Non-European ethnicity child (%)                                             | 39.0              | 55.6              | <0.001         |

Body mass index, BMI; Diastolic blood pressure, DBP; Systolic blood pressure, SBP.

Values are percentages for categorical variables, means (SD) for continuous variables with a normal distribution, or medians (5<sup>th</sup>, 95<sup>th</sup> percentile) for continuous variables with a skewed distribution.

**Figure S1. Timeline of exposures, outcomes and confounders measured in mother and child.**

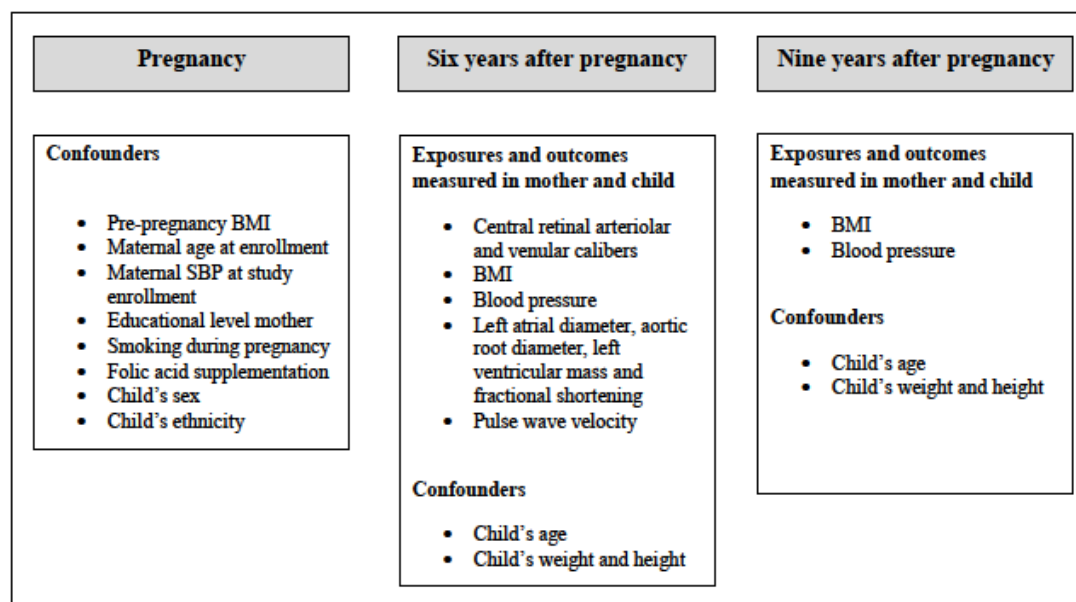

Body mass index, BMI; Systolic blood pressure, SBP.

Figure S2. Overview of results in complicated and uncomplicated pregnancies.

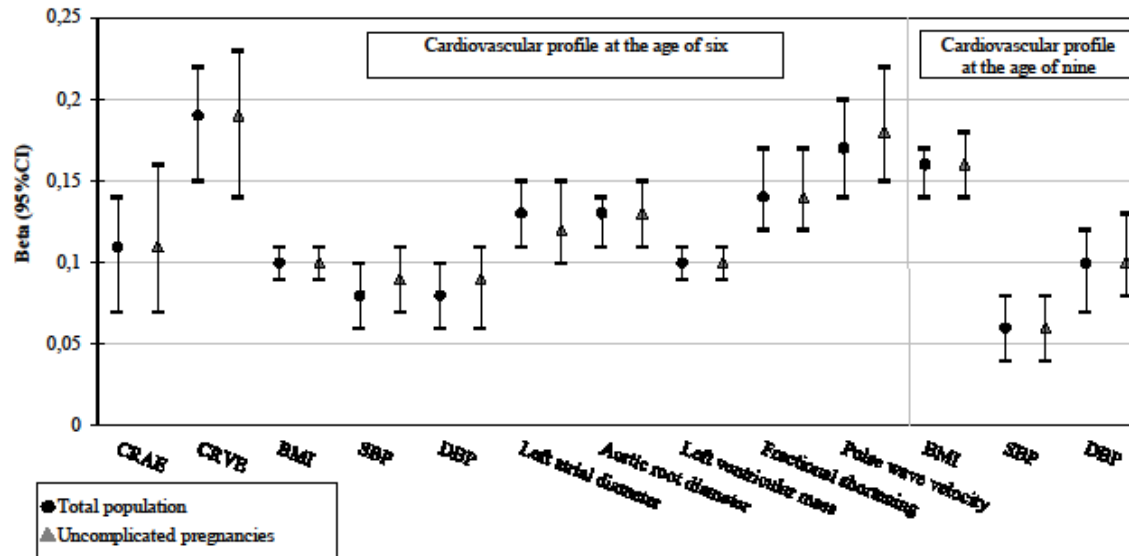

Body mass index, BMI; Central retinal arteriolar caliber, CRAE; Central retinal venular caliber, CRVE; Confidence Interval, CI; Diastolic blood pressure, DBP; Systolic blood pressure, SBP. Values are betas with corresponding 95% CI and represent the mean difference in children per unit increase in maternal parameter.
